# Supplementary material for: Electron attachment to microhydrated 4-nitro- and 4-bromo-thiophenol
Source: Royal Society of Chemistry journal article supplement (doi:10.1039/d1cp02019f), 2021-01-01
Supplement: d1cp02019f1.pdf [file d1cp02019f1.pdf]

## Electron attachment to microhydrated 4-nitro- and 4-bromo-thiophenol

Leo Sala,<sup>a</sup> Barbora Sedmidubská,<sup>a,b</sup> Ivo Vinklárěk,<sup>a</sup> Michal Fárník,<sup>a</sup> Robin Schürmann,<sup>c</sup> Ilko Bald,<sup>c</sup> Jakub Med,<sup>d</sup> Petr Slavíček,<sup>\*d</sup> and Jaroslav Kočíšek<sup>\*a</sup>

### Supplementary Information

|                                                                                                                                                                                  |        |
|----------------------------------------------------------------------------------------------------------------------------------------------------------------------------------|--------|
| Negative ion MS for BTP expansion at low hydration conditions                                                                                                                    | S2     |
| Table of calculated reaction energies for selected anion formation and fragmentation channels using B3LYP functional with aug-cc-pVDZ basis set                                  | S2     |
| Electron current profiles for individual measurements                                                                                                                            | S3     |
| Molecular Dynamics at B3LYP/aug-cc-pVDZ level                                                                                                                                    | S3     |
| Relative energies upon vertical electron attachment and subsequent relaxation to stable anion calculated using B3LYP functional with aug-cc-pVDZ basis set                       | S4     |
| Optimized geometries of pure and hydrated BTP and NTP clusters in neutral and anionic state used for energetics calculations at the LC- $\omega$ PBE/aug-cc-pVDZ level of theory | S4-S11 |

---

\* Corresponding authors.

<sup>a</sup> J. Heyrovský Institute of Physical Chemistry of the Czech Academy of Sciences, Dolejškova 3, 18223 Prague, Czech Republic; E-mail: jaroslav.kocisek@jh-inst.cas.cz

<sup>b</sup> Department of Nuclear Chemistry, Faculty of Nuclear Sciences and Physical Engineering, Břehová 7, 11519 Prague, Czech Republic

<sup>c</sup> Physical Chemistry, Institute of Chemistry, University of Potsdam, Karl-Liebknecht-Str. 24-25, 14476 Potsdam-Golm, Germany

<sup>d</sup> Department of Physical Chemistry, University of Chemistry and Technology, Prague, Technická 5, 16628 Prague, Czech Republic; E-mail: Petr.Slavicek@vscht.cz

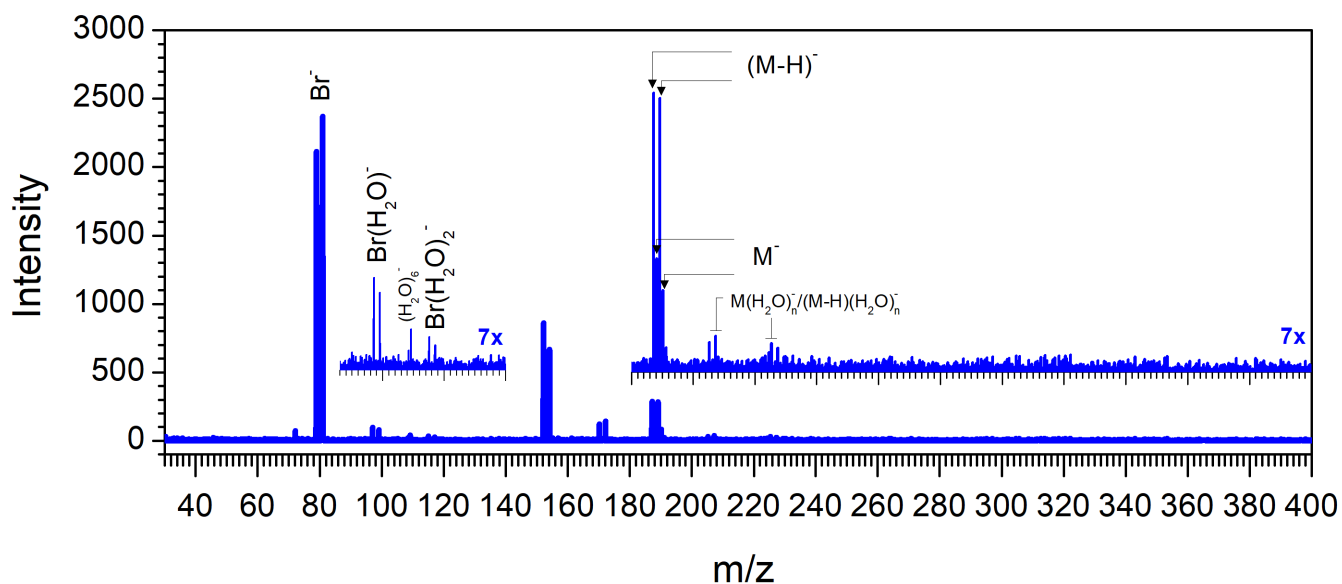

**Figure S1** Cumulative negative ion mass spectra (0.6-8.6 eV) of BTP in low hydration conditions (He carrier gas,  $P_0 = 1.5$  bar).

**Table 1** Calculated reaction energies for selected anion formation and fragmentation channels, where M stands for BTP or NTP molecule. The calculations were done using B3LYP functional with aug-cc-pVDZ basis set and D3BJ dispersion correction. All energies are presented in units of eV.

| row | precursor<br>$n=$                                           | BTP(H <sub>2</sub> O) <sub>n</sub> |       |       | NTP(H <sub>2</sub> O) <sub>n</sub> |      |      |
|-----|-------------------------------------------------------------|------------------------------------|-------|-------|------------------------------------|------|------|
|     |                                                             | 1                                  | 2     | 3     | 1                                  | 2    | 3    |
| 1   | $M(H_2O)_n + e^- \rightarrow [M(H_2O)_n-H]^- + H$           | 0.57                               | 0.51  | 0.5   | 0.13                               | 0.21 | 0.21 |
| 2   | $BTP(H_2O)_n + e^- \rightarrow (BTP(H_2O)_n-Br) + Br^-$     | 0.02                               | 0.00  | 0.07  | -                                  | -    | -    |
| 3   | $BTP(H_2O)_n + e^- \rightarrow (BTP-Br) + Br(H_2O)_n^-$     | -0.34                              | -0.53 | -0.26 | -                                  | -    | -    |
| 4   | $NTP(H_2O)_n + e^- \rightarrow (NTP(H_2O)_n-NO_2) + NO_2^-$ | -                                  | -     | -     | 1.07                               | 1.02 | 1.05 |
| 5   | $M(H_2O)_n \rightarrow M + (H_2O)_n$                        | 0.19                               | 0.39  | 0.40  | 0.26                               | 0.43 | 0.39 |
| 6   | $M(H_2O)_n \rightarrow M + n(H_2O)$                         | -                                  | 0.62  | 1.13  | -                                  | 0.66 | 1.12 |
| 7   | $M(H_2O)_n^- \rightarrow M^- + (H_2O)_n$                    | 0.54                               | 0.92  | 0.96  | 0.72                               | 0.88 | 1.17 |
| 8   | $M(H_2O)_n^- \rightarrow M^- + n(H_2O)$                     | -                                  | 1.15  | 1.69  | -                                  | 1.11 | 1.90 |

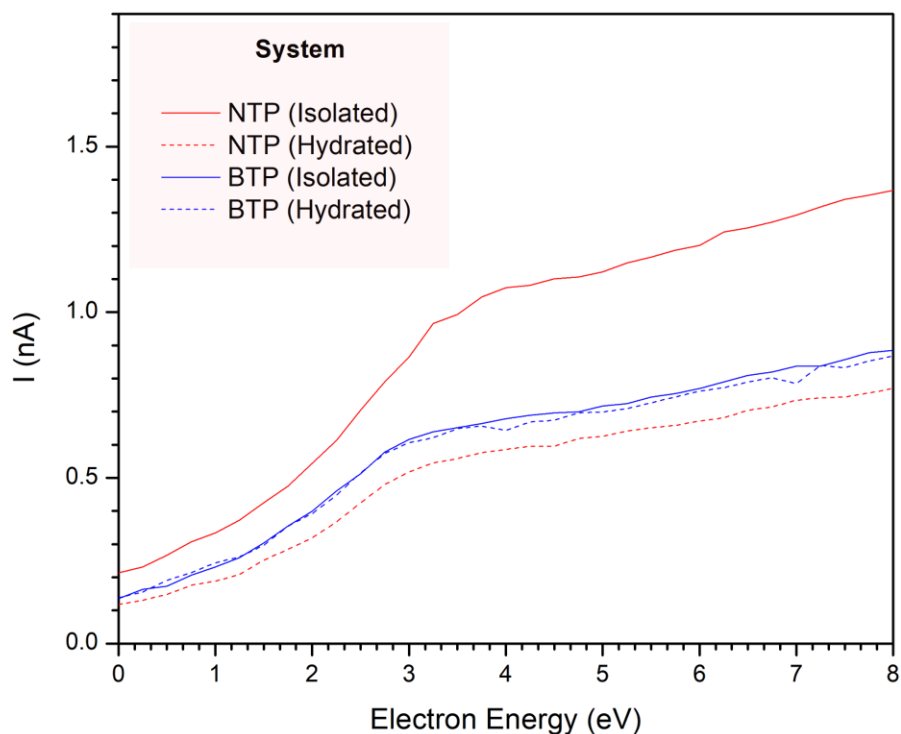

**Figure S2** Electron current profiles during the anion mass spectrum measurement of isolated and hydrated NTP and BTP.

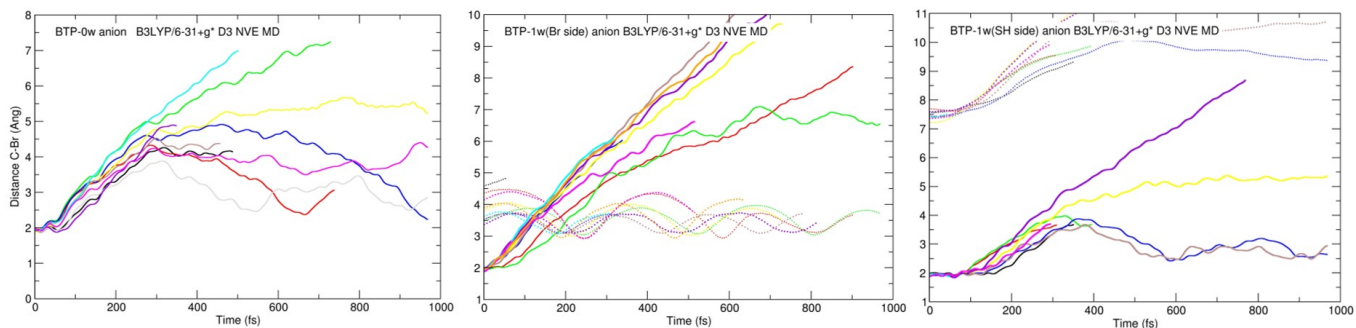

**Figure S3** Results of MD simulations at B3LYP/aug-cc-pVDZ level of theory of time evolution of 10 trajectories of BTP and 20 trajectories of BTP(H<sub>2</sub>O) clusters upon vertical electron attachment simulated for 1 ps. Figure shows time evolution of distance between Br and nearest C atom (full lines) and Br to H<sub>2</sub>O distance (dotted lines) along the simulation. For pure BTP clusters (left panel) we observe C-Br dissociation within 100 fs in all calculations. For BTP(H<sub>2</sub>O)<sup>-</sup> clusters with H<sub>2</sub>O attached to Br atom (left panel) we observe fast dissociation (within 100 fs) of the C-Br bond. The H<sub>2</sub>O molecule remains bound to the bromine atom. For BTP(H<sub>2</sub>O)<sup>-</sup> clusters with H<sub>2</sub>O attached to SH group (right panel) we observe either direct dissociation or stabilization of the C-Br bond at distance of ionic bond. In all cases, H<sub>2</sub>O remained bound to the SH group.

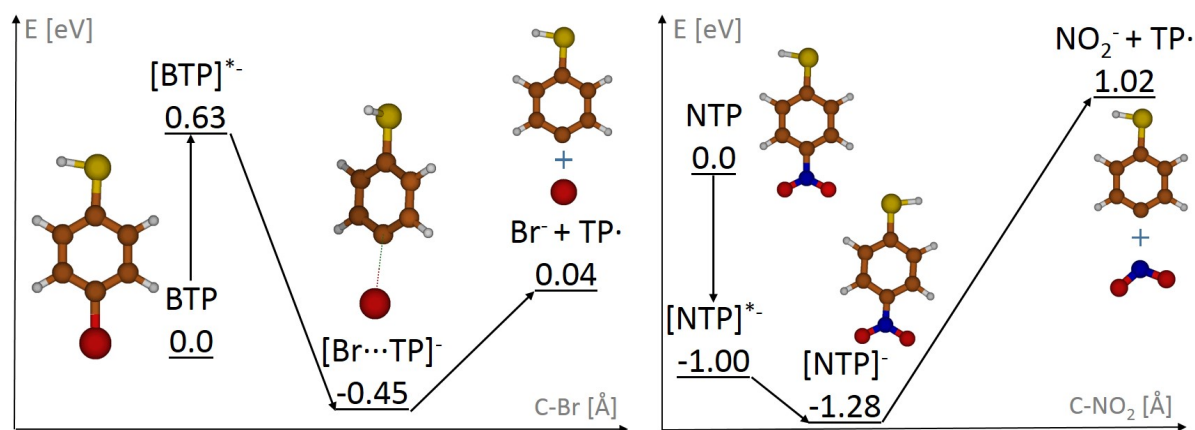

**Figure S4** Relative energies of BTP (left) and NTP (right) molecules upon vertical electron attachment and subsequent relaxation to stable anion. Energies calculated at the B3LYP/aug-cc-pVDZ level of theory are presented in eV units.

XYZ coordinates of optimized structures at the LC- $\omega$ PBE/aug-cc-pVDZ level of theory used for the energetics calculations:

#### Bromothiophenol neutral

C 1.348235 1.201033 0.000009  
 C 2.049569 -0.001389 0.000012  
 C 1.345629 -1.203843 0.000008  
 C -0.041010 -1.206170 -0.000001  
 C -0.726760 0.000046 -0.000004  
 C -0.039319 1.204485 0.000001  
 S 3.815949 -0.079691 0.000022  
 Br -2.608688 0.001831 -0.000017  
 H 4.038426 1.247717 0.000049  
 H 1.883586 -2.151609 0.000013  
 H -0.588266 -2.147073 -0.000005  
 H 1.882145 2.150658 0.000013  
 H -0.585058 2.146313 -0.000001

#### Bromothiophenol anion

C 0.414333 -0.000065 -0.154374  
 C -0.261332 -1.205913 -0.125275  
 C -1.653295 -1.208100 -0.065553  
 C -2.348109 0.000016 -0.028112  
 C -1.653222 1.208093 -0.065548  
 C -0.261259 1.205824 -0.125249  
 S -4.135145 0.000060 0.029494  
 Br 3.109980 0.000010 0.055076  
 H -4.273877 -0.000346 1.371821  
 H -2.211556 2.145530 -0.045398  
 H 0.293787 2.145607 -0.147946  
 H -2.211685 -2.145504 -0.045391  
 H 0.293654 -2.145732 -0.147980

#### Nitrothiophenol neutral

C -1.211875 0.440148 0.000000  
 C 0.000000 1.111313 0.000000

C 1.210350 0.438862 0.000000  
C 1.206930 -0.945467 0.000000  
C -0.000810 -1.643602 0.000000  
C -1.208839 -0.943444 0.000000  
N 0.001689 2.577454 0.000000  
O 1.077754 3.139826 0.000000  
S -0.079512 -3.403815 0.000000  
O -1.072947 3.142206 0.000000  
H 1.248092 -3.626728 0.000000  
H -2.153458 -1.485934 0.000000  
H -2.139799 1.006825 0.000000  
H 2.153744 -1.483242 0.000000  
H 2.138791 1.004809 0.000000

Nitrothiophenol anion

C -1.217625 0.446202 0.000000  
C 0.000000 1.161189 0.000000  
C 1.213293 0.439496 0.000000  
C 1.200091 -0.941735 0.000000  
C -0.007507 -1.648266 0.000000  
C -1.211867 -0.935073 0.000000  
N 0.005034 2.541165 0.000000  
O 1.121136 3.151416 0.000000  
S -0.078041 -3.426650 0.000000  
O -1.106222 3.159639 0.000000  
H 1.249749 -3.645743 0.000000  
H -2.160862 -1.474605 0.000000  
H -2.142745 1.016973 0.000000  
H 2.148117 -1.483003 0.000000  
H 2.141538 1.005310 0.000000

Triphenolyl radical

C -0.252120 1.209454 -0.000002  
C 0.438162 -0.001222 0.000003  
C -0.260859 -1.208419 0.000000  
C -1.654187 -1.214421 -0.000010  
C -2.281093 0.006902 -0.000014  
C -1.646299 1.223445 -0.000009  
S 2.207838 -0.084341 0.000010  
H 2.434667 1.242150 0.000057  
H 0.284152 -2.152994 0.000006  
H -2.206698 -2.153414 -0.000014  
H 0.293549 2.153229 0.000000  
H -2.192710 2.166054 -0.000012

BTP(H<sub>2</sub>O) neutral

C 0.745464 -1.403440 -0.096701  
C -0.613821 -1.683535 -0.089335  
C -1.541642 -0.652515 0.017666  
C -1.111073 0.667889 0.105189  
C 0.247237 0.954283 0.103531

C 1.162784 -0.083846 0.003211  
S -3.286099 -1.042556 -0.009218  
Br 3.003429 0.305551 -0.004111  
O -4.081732 2.229685 -0.080765  
H -3.474161 -1.033035 1.326813  
H -1.834855 1.479492 0.169927  
H 0.592219 1.983857 0.175002  
H -0.958347 -2.713714 -0.166732  
H 1.475977 -2.205899 -0.179054  
H -4.121482 1.270504 -0.205845  
H -4.901626 2.574923 -0.443980

BTP(H<sub>2</sub>O) anion

C 0.239875 -1.157280 -0.789475  
C -1.114159 -1.429563 -0.598401  
C -1.891406 -0.560617 0.162207  
C -1.319262 0.574837 0.737718  
C 0.038476 0.826170 0.560051  
C 0.801528 -0.035163 -0.209316  
S -3.638688 -0.897205 0.341647  
Br 3.443924 0.137850 0.041770  
O -3.776716 2.322450 -0.796216  
H -3.685474 -0.905227 1.688686  
H -1.938922 1.257286 1.322268  
H 0.502701 1.697922 1.025030  
H -1.573119 -2.319502 -1.032137  
H 0.857020 -1.833718 -1.383711  
H -3.975329 1.447683 -0.435181  
H -2.821787 2.296182 -0.920236

BTP(H<sub>2</sub>O)<sub>2</sub> neutral

C 1.528058 -0.911437 0.043323  
C 0.733349 -1.221529 -1.054549  
C -0.621524 -0.921851 -1.042386  
C -1.177510 -0.326138 0.081063  
C -0.393551 -0.016558 1.185560  
C 0.963653 -0.299969 1.159072  
Br -3.013827 0.077167 0.105762  
S 3.270363 -1.248276 -0.058939  
O 0.941052 2.403394 -1.221797  
O 3.244591 2.025914 0.534317  
H 3.462518 -1.508528 1.249115  
H 1.172353 -1.698649 -1.929613  
H -1.244315 -1.155235 -1.903661  
H 1.585768 -0.021152 2.008223  
H -0.838609 0.460004 2.056792  
H 0.223712 1.851008 -0.897923  
H 1.648467 2.303988 -0.565426  
H 3.538197 1.151124 0.237775  
H 3.930034 2.639460 0.253394

BTP(H<sub>2</sub>O)<sub>2</sub> anion

C -0.766411 1.136295 1.152534  
C -1.527554 1.172738 -0.067654  
C -0.875619 0.713082 -1.252168  
C 0.454158 0.371933 -1.260577  
C 1.224744 0.496859 -0.066551  
C 0.565657 0.803907 1.150551  
S -3.247728 1.492289 -0.040536  
Br 2.981815 -0.196169 -0.024844  
O -0.847877 -2.127524 0.421522  
O -3.500920 -2.918182 -0.027376  
H -3.779477 0.254233 0.206380  
H -1.450589 0.644148 -2.176830  
H 0.930962 0.044249 -2.184309  
H -1.254399 1.406466 2.089835  
H 1.123301 0.782591 2.087258  
H -2.553376 -2.743687 0.143799  
H -3.800849 -2.099079 -0.431123  
H -0.774489 -1.406753 1.067794  
H -0.500447 -1.696121 -0.374682

BTP(H<sub>2</sub>O)<sub>3</sub> neutral

C 0.541565 -0.027644 1.130337  
C 1.433915 0.364615 0.139729  
C 1.003153 1.122904 -0.942004  
C -0.334843 1.482532 -1.031541  
C -1.240157 1.093852 -0.045328  
C -0.793673 0.336909 1.037083  
Br 3.240094 -0.155667 0.252618  
S -2.930121 1.581882 -0.218312  
O -3.593610 -1.112222 1.698883  
H -3.417517 0.788642 0.766680  
H -1.496388 0.011992 1.802493  
H 0.887314 -0.624060 1.972587  
H -0.676340 2.067092 -1.885310  
H 1.707058 1.423958 -1.715501  
H -4.388104 -1.555068 2.006975  
H -3.384752 -1.506624 0.824229  
O -2.979836 -1.796340 -0.885968  
H -3.173457 -0.937138 -1.279720  
H -2.045198 -1.964791 -1.109867  
O -0.259404 -2.053109 -1.559088  
H 0.263551 -2.819003 -1.304327  
H 0.205501 -1.292382 -1.187156

BTP(H<sub>2</sub>O)<sub>3</sub> anion

C -0.464475 -1.129197 -0.482369  
C 0.240852 -0.362170 -1.386946  
C 1.620603 -0.251894 -1.233395  
C 2.253435 -0.893582 -0.169956  
C 1.514099 -1.661850 0.732137

C 0.133349 -1.781183 0.575579  
S 4.018079 -0.725592 0.058436  
Br -3.167617 -0.473999 -0.03787  
O 0.998566 1.628498 1.573289  
O 1.287175 3.095026 -0.799918  
O -1.445243 2.197781 0.541138  
H 3.998365 0.520577 0.575569  
H 2.025813 -2.142359 1.566546  
H -0.465121 -2.354234 1.284029  
H 2.207177 0.358847 -1.918789  
H -0.270217 0.159491 -2.196397  
H -2.015575 1.402353 0.410430  
H -1.044836 2.349094 -0.323120  
H 1.136439 3.987428 -0.477248  
H 1.311108 2.552207 0.016182  
H 1.143349 0.704433 1.337059  
H 0.039652 1.770396 1.389931

NTP(H<sub>2</sub>O)<sub>1</sub> neutral

C -1.189445 0.247775 0.000000  
C 0.000000 0.955410 0.000000  
C 1.221866 0.279381 0.000000  
C 1.234470 -1.119278 0.000000  
C 0.050194 -1.832604 0.000000  
C -1.148343 -1.135491 0.000000  
S 2.760617 1.130246 0.000000  
N -2.405612 -1.880892 0.000000  
O -3.438438 -1.240378 0.000000  
O -2.347590 -3.094060 0.000000  
O 1.570161 4.363034 0.000000  
H 2.249054 2.383092 0.000000  
H 2.186587 -1.647647 0.000000  
H 0.032295 -2.920111 0.000000  
H -0.009372 2.044166 0.000000  
H -2.155239 0.750704 0.000000  
H 0.769254 4.894174 0.000000  
H 2.311319 4.977983 0.000000

NTP(H<sub>2</sub>O)<sub>1</sub> anion

C -0.871335 -0.287405 0.000000  
C 0.000000 0.818227 0.000000  
C 1.368169 0.617218 0.000000  
C 1.907446 -0.671735 0.000000  
C 1.042344 -1.769440 0.000000  
C -0.327730 -1.587380 0.000000  
S 3.659311 -0.978963 0.000000  
N -2.244751 -0.122125 0.000000  
O -2.991207 -1.143276 0.000000  
O -2.741554 1.059938 0.000000  
O -2.070864 3.655592 0.000000  
H 4.052609 0.308104 0.000000



H 1.449076 -2.782107 0.000000  
H -1.016875 -2.427630 0.000000  
H 2.028873 1.485480 0.000000  
H -0.402229 1.826841 0.000000  
H -2.318129 2.698645 0.000000  
H -2.913406 4.113999 0.000000

NTP(H<sub>2</sub>O)<sub>2</sub> neutral

C 1.511550 -1.306304 0.278431  
C 1.837211 -0.007738 -0.077635  
C 0.889352 0.884335 -0.551027  
C -0.426421 0.468078 -0.669971  
C -0.776087 -0.835988 -0.315712  
C 0.196101 -1.719026 0.158116  
N 3.229473 0.435815 0.051271  
O 3.488146 1.580267 -0.260683  
S -2.437112 -1.424841 -0.429212  
O 4.041413 -0.367092 0.464112  
O -2.823258 0.949066 1.935076  
O -3.449763 1.785100 -0.659203  
H -2.984833 -0.276950 -0.897126  
H -0.078666 -2.737279 0.431037  
H 2.287584 -1.974791 0.643151  
H -1.185854 1.157679 -1.035452  
H 1.190197 1.893676 -0.821613  
H -3.333029 1.699710 0.305593  
H -4.254135 2.292745 -0.792911  
H -1.948748 1.185913 2.259969  
H -2.747569 0.027188 1.648217

NTP(H<sub>2</sub>O)<sub>2</sub> anion

C 0.809613 1.187368 0.245362  
C 0.124370 -0.043587 0.242578  
C 0.846271 -1.240913 0.068243  
C 2.215546 -1.196678 -0.104825  
C 2.899448 0.024301 -0.115755  
C 2.179128 1.209788 0.069421  
N -1.244973 -0.076917 0.412947  
O -1.846098 -1.203072 0.405852  
S 4.667973 0.066427 -0.322184  
O -1.875904 1.025275 0.572293  
O -4.376791 -0.084171 0.760002  
O -6.009762 0.208465 -1.423721  
H 4.702637 0.144592 -1.670317  
H 2.712197 2.160722 0.072622  
H 0.232575 2.097005 0.388593  
H 2.777029 -2.121834 -0.236344  
H 0.296998 -2.178588 0.076950  
H -5.466138 0.098848 -0.607911  
H -5.350275 0.309747 -2.114592  
H -3.674048 0.599357 0.755314

H -3.781544 -0.847905 0.654441

NTP(H<sub>2</sub>O)<sub>3</sub> neutral

C 0.130551 -1.817161 0.643291  
C 0.885565 -1.041562 -0.222334  
C 0.307591 -0.113478 -1.072109  
C -1.065525 0.046736 -1.051705  
C -1.843334 -0.707911 -0.175893  
C -1.239970 -1.642304 0.668038  
N 2.336673 -1.203752 -0.226215  
S -3.592612 -0.529994 -0.078625  
O -0.313343 3.151464 -0.656053  
O 2.173658 2.227929 0.428991  
O -0.179929 1.738968 1.733204  
H -3.701967 0.473330 -0.969282  
H -1.847899 -2.230023 1.354442  
H 0.623008 -2.537281 1.292006  
H -1.522525 0.784717 -1.707180  
H 0.926905 0.475744 -1.742982  
H -0.237070 2.037562 2.644335  
H 0.769079 1.777993 1.489441  
H 2.615103 1.515762 -0.053698  
H 1.570719 2.648762 -0.206610  
H -0.521136 4.086026 -0.571355  
H -0.532457 2.750033 0.208656  
O 2.805729 -2.173324 0.326399  
O 3.005641 -0.347835 -0.786540

NTP(H<sub>2</sub>O)<sub>3</sub> anion

C -1.111565 -1.214928 -0.053251  
C -0.407995 -0.000192 0.019364  
C -1.112644 1.213330 0.100157  
C -2.494548 1.202165 0.100301  
C -3.200642 -0.001326 0.016990  
C -2.493393 -1.205219 -0.050625  
N 0.974783 0.000714 0.014949  
S -4.982735 -0.002959 0.041837  
O 3.512292 -0.144099 1.803773  
O 3.465830 0.144017 -1.826044  
O 5.779635 0.000455 -0.040794  
H -5.187080 0.060265 -1.291366  
H -3.044305 -2.144173 -0.102549  
H -0.542556 -2.139047 -0.108131  
H -3.046388 2.139772 0.164964  
H -0.544513 2.137566 0.161754  
H 3.032907 -0.827221 1.302609  
H 3.062499 0.639632 1.446500  
H 5.176051 -0.064438 0.718473  
H 5.157514 0.063650 -0.785076  
H 3.002527 0.831761 -1.316487  
H 3.024130 -0.636357 -1.451100

O 1.604887 -1.114762 -0.062226

O 1.604132 1.116632 0.086387
